# Supplementary material for: Cell-cell fusion as a mechanism of DNA exchange in cancer
Source: PubMed Central journal article supplement (PMC5814202; doi:10.18632/oncotarget.23715), 2017-12-27
Supplement: oncotarget-09-6156-s001.pdf [file oncotarget-09-6156-s001.pdf]

## Cell-cell fusion as a mechanism of DNA exchange in cancer

### SUPPLEMENTARY MATERIALS

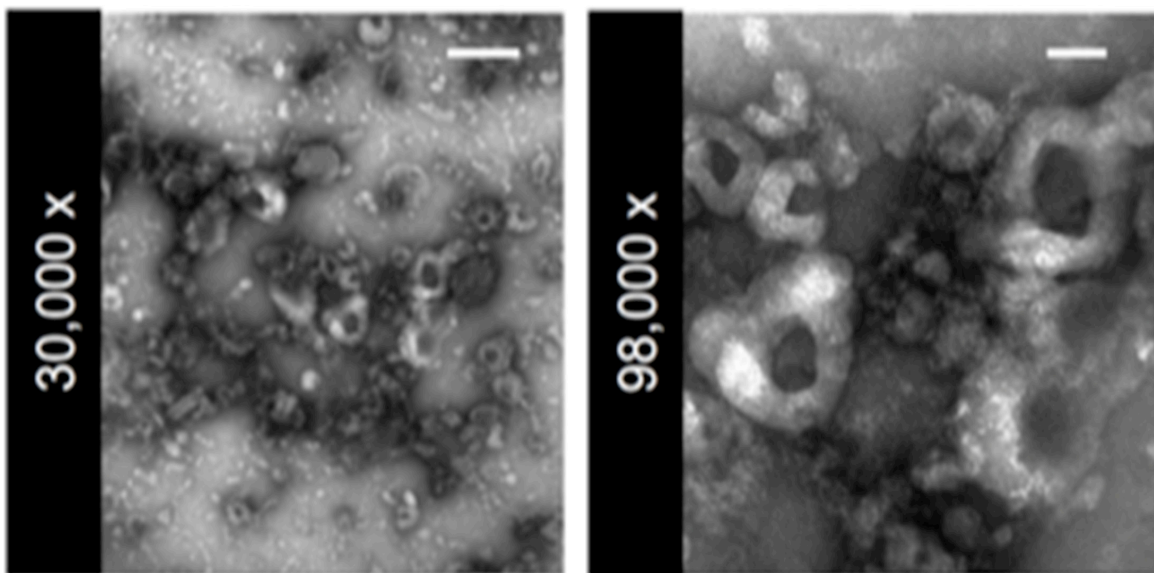

**Supplementary Figure 1: Size and morphology of B16-GFP-Cre ECVs.** Electron micrographs showing size and morphology of vesicles isolated from the conditioned media of B16-GFP-Cre cells via differential ultracentrifugation. Size bar equals 200 nm (30,000×) or 50 nm (98,000×).

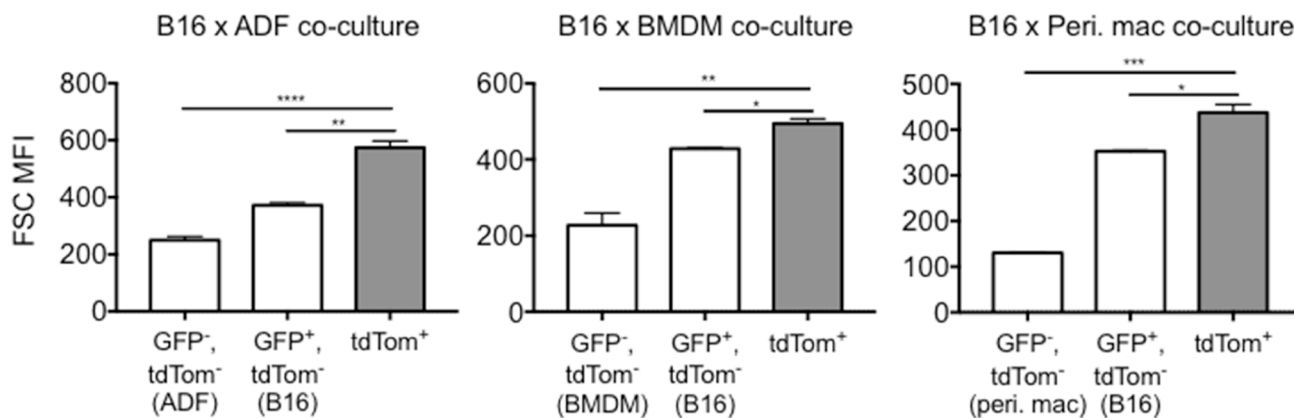

**Supplementary Figure 2: (Related to Figure 3B): Reporter<sup>+</sup> cells are larger than B16 cells and Reporter<sup>-</sup> cells.** FSC analysis of three populations of cells (GFP<sup>-</sup>/tdTomato<sup>-</sup>, GFP<sup>+</sup>/tdTomato<sup>-</sup>, tdTomato<sup>+</sup>) from 48 hr co-cultures of B16-GFP-Cre cells with various reporter cells (indicated).

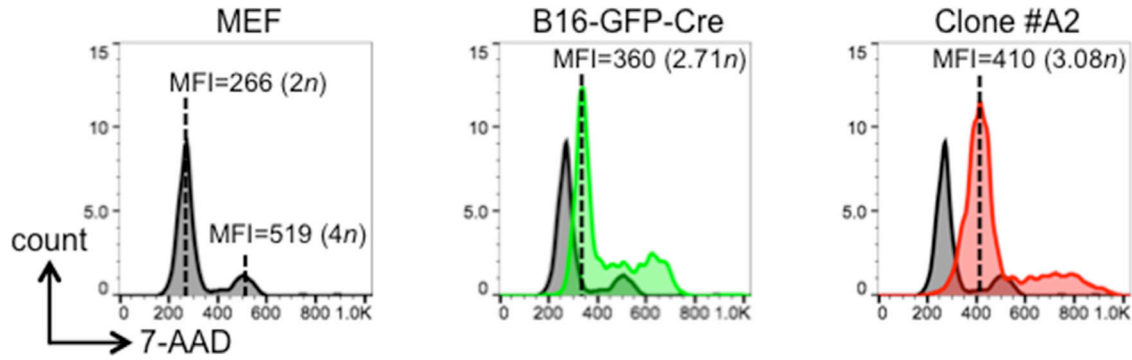

**Supplementary Figure 3: (Related to Figure 4D): FACS-based quantification of DNA content.** Representative histograms showing DNA content of MEF, B16-GFP-Cre, and one of the twenty tdTomato+ clones (#A2). The two peaks in each histogram correspond to cells in the G1 (left peak) or G2 (right peak) phase of the cell cycle. For B16-GFP-Cre and each of the twenty tdTomato+ clones, relative ploidy was calculated by normalizing the MFI of the G1 peak to MEF, which were set as  $2n$ .

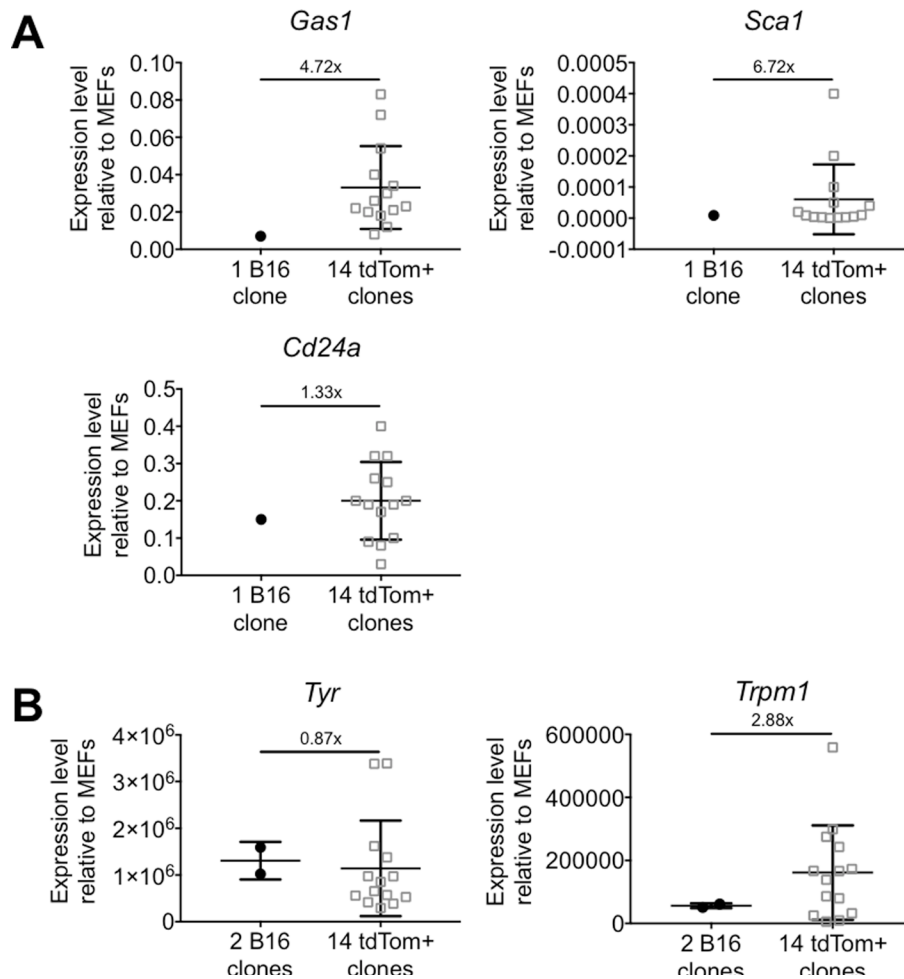

**Supplementary Figure 4: (Related to Figure 5C): B16xMEF hybrids express both B16- and MEF-restricted genes.** (A) Comparison of the average expression level of three candidate “MEF genes” in B16-GFP-Cre cells and fourteen tdTomato+ clones ( $n = 2$  independent experiments per data point). For the tdTomato+ clones, data is represented as mean  $\pm$  SEM. (B) Comparison of the average expression level of two candidate “B16 genes” in two B16-GFP-Cre clones and fourteen tdTomato+ clones ( $n = 2$  independent experiments per data point). Data is represented as mean  $\pm$  SEM.

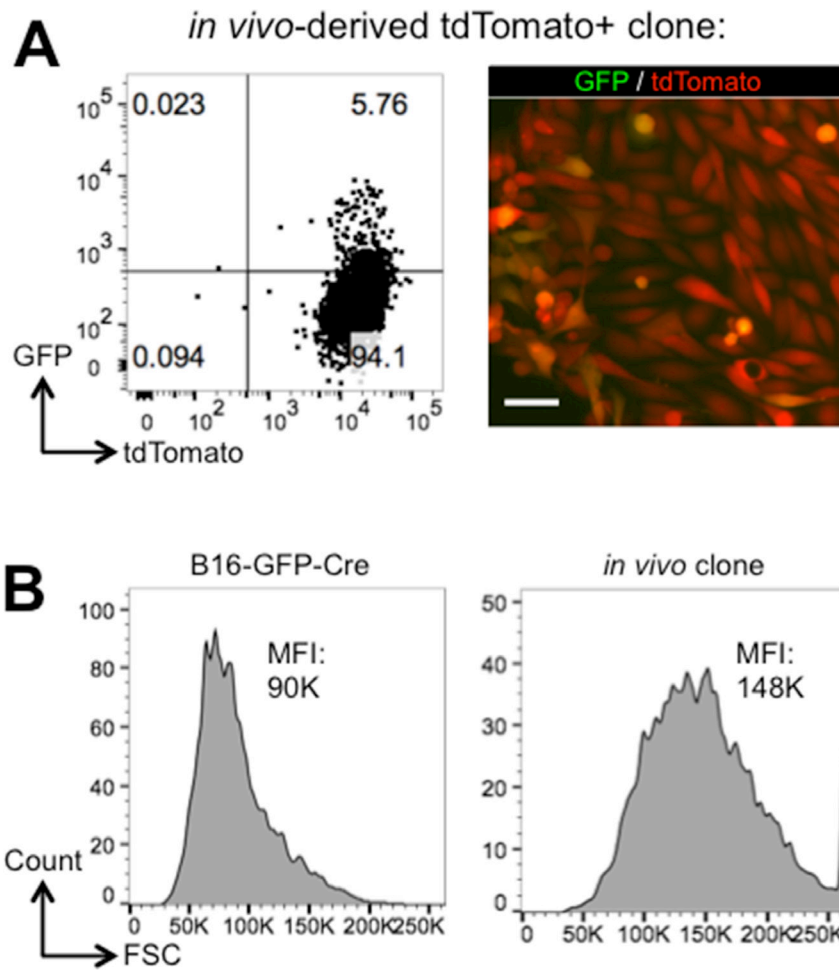

**Supplementary Figure 5: (Related to Figure 7E): Cell-cell fusion occurs *in vivo*.** (A) Representative FACS plot and fluorescent micrograph showing GFP and tdTomato expression in the *in vivo*-derived tdTomato<sup>+</sup> clone after four passages. Scale bar = 100  $\mu$ M. (B) Representative histograms showing FSC (as a read-out for cell size) of B16-GFP-Cre and the *in vivo*-derived clone.

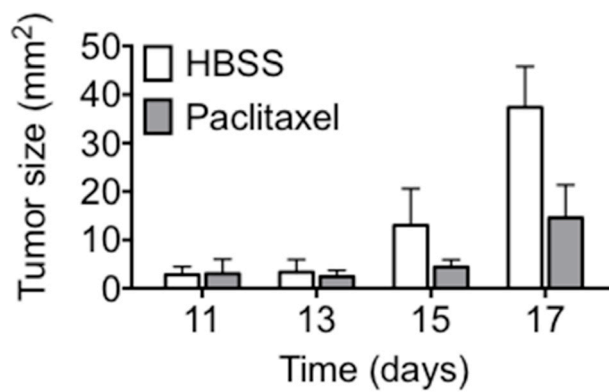

**Supplementary Figure 6: (Related to Figure 7F): Paclitaxel treatment shrinks B16-GFP-Cre tumors *in vivo*.** (A) Bar graph showing the size of B16-GFP-Cre tumors that were grown in mice treated with paclitaxel or HBSS (control). Data are represented as mean  $\pm$  SEM ( $n = 6$  mice per group).

**Supplementary Video 1: (Related to Figure 3): Cell-cell fusion mediates the transfer of Cre from B16 melanoma cells to MEF.** (A) Live-cell imaging of B16-GFP-Cre cells co-cultured with CellTracker Blue-labeled reporter MEF between 2 and 18 hours. Scale bar equals 50  $\mu$ M. Green represents GFP, blue represents CellTracker Blue, and red represents tdTomato. See Supplementary\_Video\_1

**Supplementary Video 2: (Related to Figure 3): Cell-cell fusion mediates the transfer of Cre from B16 melanoma cells to MEF.** (A) Live-cell imaging of B16-GFP-Cre cells co-cultured with CellTracker Blue-labeled reporter MEF between 2 and 18 hours. Scale bar equals 50  $\mu$ M. Green represents GFP, blue represents CellTracker Blue, and red represents tdTomato. See Supplementary\_Video\_2

**Supplementary Video 3: (Related to Figure 3): Cell-cell fusion mediates the transfer of Cre from B16 melanoma cells to MEF.** (A) Live-cell imaging of B16-GFP-Cre cells co-cultured with CellTracker Blue-labeled reporter MEF between 2 and 18 hours. Scale bar equals 50  $\mu$ M. Green represents GFP, blue represents CellTracker Blue, and red represents tdTomato. See Supplementary\_Video\_3

**Supplementary Video 4: (Related to Figure 3): Reporter<sup>+</sup> cell undergoing apoptosis.** (A) Live-cell imaging of B16-GFP-Cre cells co-cultured with CellTracker Blue-labeled reporter MEF between 18 and 40 hours. Scale bar equals 50  $\mu$ M. Green represents GFP, blue represents CellTracker Blue, and red represents tdTomato. See Supplementary\_Video\_4

**Supplementary Video 5: (Related to Figure 3): Cell-cell fusion mediates the transfer of Cre from B16 melanoma cells to MEF.** (A) Live-cell imaging of B16-GFP-Cre cells co-cultured with unlabeled reporter MEF between 2 and 20 hours. Scale bar equals 50  $\mu$ M. Green represents GFP and red represents tdTomato. See Supplementary\_Video\_5

**Supplementary Table 1: Primer sequences**

| Table of primers       |                                |
|------------------------|--------------------------------|
| Name                   | Sequence (5' to 3')            |
| <i>Bmp4</i> (forward)  | GGCTGGCCATTGAGGTGACT           |
| <i>Bmp4</i> (reverse)  | TCGGCTGATTCTGACATGCTG          |
| <i>Cd24a</i> (forward) | CTGCTGGCACTGCTCCTAC            |
| <i>Cd24a</i> (reverse) | GGTGGTGGCATTAGTTGGAT           |
| <i>CRE</i> (forward)   | GCCAGCTAAACATGCTTCATC          |
| <i>CRE</i> (reverse)   | ATTGCCCTGTTTTCACTATCC          |
| <i>Fgf2</i> (forward)  | TCCAGTTGGTATGTGGCACTGA         |
| <i>Fgf2</i> (reverse)  | CAGTATGGCCTTCTGTCCAGGTC        |
| <i>Gapdh</i> (forward) | GGAGCCAAAAGGGTCATCAT           |
| <i>Gapdh</i> (reverse) | GTGATGGCATGGACTGTGGT           |
| <i>Gas1</i> (forward)  | CCCTCTTCTGTGCGGTTTTTC          |
| <i>Gas1</i> (reverse)  | CACCGTTCAGCACTCTGAGTC          |
| <i>Hprt</i> (forward)  | GCTTGCTGGTGAAAAGGACCTCTCGAAG   |
| <i>Hprt</i> (reverse)  | CCCTGAAGTACTCATTATAGTCAAGGGCAT |
| <i>Met</i> (forward)   | GCATGTCAGCATCGCTCAA            |
| <i>Met</i> (reverse)   | TGCAGGCCAGCTGTTTTC             |
| <i>Mitf</i> (forward)  | GCCTTGTTTATGGTGCCTTC           |
| <i>Mitf</i> (reverse)  | GTCCTCCTCCCTCTACTTTCTGT        |
| <i>Scal</i> (forward)  | CTCTGAGGATGGACACTTCT           |
| <i>Scal</i> (reverse)  | GGTCTGCAGGAGGACTGAGC           |
| <i>Trpm1</i> (forward) | GAGCTGAAGGAGGCTAGGCTG          |
| <i>Trpm1</i> (reverse) | CTTGGTGTCTCTCTCTGTTGT          |
| <i>Tyr</i> (forward)   | CCTCCTGGCAGATCATTTGT           |
| <i>Tyr</i> (reverse)   | ATCGCATAAAACCTGATGGC           |
